# Supplementary material
Source: publisher figshare collection journal article supplement (https://acs.figshare.com/ndownloader/files/3944392)
Supplement: Supplementary file 1 [file 3944392]

data_ECS-17 120�C un
_audit_creation_method 'from EXP file using GSAS2CIF'
_audit_creation_date	2013-10-02
_audit_update_record	2013-10-02
_chemical_formula_sum	'Al Si2 O5 C6 K'
_chemical_formula_weight	274.314
_cell_length_a	10.1307(9)
_cell_length_b	 9.1486(10)
_cell_length_c	10.6002(11)
_cell_angle_alpha	90.000
_cell_angle_beta	106.526(9)
_cell_angle_gamma	90.000
_cell_volume	941.9(2)
_cell_formula_units_Z	4
_symmetry_int_tables_number	14
_symmetry_space_group_name_H-M	'P 1 21/a 1'
_symmetry_space_group_name_Hall	'-P_2yab'

loop_
_symmetry_equiv_pos_site_id
_symmetry_equiv_pos_as_xyz
1 x,y,z
2 0.500-x,0.500+y,-z
3 -x,-y,-z
4 0.500+x,0.500-y,z

loop_
_atom_site_label
_atom_site_type_symbol
_atom_site_fract_x
_atom_site_fract_y
_atom_site_fract_z
_atom_site_occupancy
_atom_site_symmetry_multiplicity
_atom_site_Wyckoff_symbol
_atom_site_attached_hydrogens
_atom_site_calc_flag
_atom_site_thermal_displace_type
_atom_site_u_iso_or_equiv
Al Al -0.0202(9)  0.2218(9)  0.4013(8)  1.000 4 e ? d Uiso  0.01000
Si1 Si  0.1936(9)  0.3635(8)  0.2916(8)  1.000 4 e ? d Uiso  0.01000
Si2 Si  0.4009(8)  0.5951(8)  0.3054(7)  1.000 4 e ? d Uiso  0.01000
O1 O  0.4430(12)  0.7027(11)  0.4269(8)  1.000 4 e ? d Uiso  0.02000
O2 O  0.2470(9)  0.5268(9)  0.2899(14)  1.000 4 e ? d Uiso  0.02000
O3 O  0.0678(15)  0.3510(11)  0.3480(14)  1.000 4 e ? d Uiso  0.02000
O4 O  0.5032(11)  0.4514(9)  0.3382(13)  1.000 4 e ? d Uiso  0.02000
O5 O  0.3059(9)  0.2635(12)  0.3819(15)  1.000 4 e ? d Uiso  0.02000
K1 K  0.2775(7) -0.0482(9)  0.3764(7)  0.99(1) 4 e ? d Uiso  0.08000
C1 C  0.3966(9)  0.6708(1)  0.1352(1)  1.000 4 e ? d Uiso  0.08000
C2 C  0.4076(13)  0.8209(2)  0.1204(1)  1.000 4 e ? d Uiso  0.08000
C3 C  0.3821(5)  0.8809(0) -0.0046(1)  1.000 4 e ? d Uiso  0.08000
C4 C  0.3457(9)  0.7911(1) -0.1148(1)  1.000 4 e ? d Uiso  0.08000
C5 C  0.3347(13)  0.6411(2) -0.0998(1)  1.000 4 e ? d Uiso  0.08000
C6 C  0.3602(5)  0.5810(2)  0.0251(2)  1.000 4 e ? d Uiso  0.08000
